# Supplementary material for: Genomic and Transcriptomic Changes That Mediate Increased Platinum Resistance in Cupriavidus metallidurans
Source: MDPI journal article supplement (doi:10.3390/genes10010063), 2019-01-18
Supplement: s1 [file s1]

|       |                                                              |       |
|-------|--------------------------------------------------------------|-------|
| 52534 | GTAGGTATGGCGTCTCCCTACGGGGCCGGGCTTTCGTGCTGCGCATCGAGCCGCCTGCG  | 52593 |
| 72139 | GTCGTTAGGGCGTCTCCCTGCGGGGCCGGGCTTTCGTGCTGCGCATCGAGCCGCCTGCG  | 72198 |
|       | ** * ** *****                                                |       |
| 52594 | GCGTCTCGCCCCTTCGGGCGTCAATCCCTGACGCCTCCGCGCCGTGCCGGCGCTGCGCGC | 52653 |
| 72199 | GCGTCTCGCCCCTTCGGGCGTCAATCCCTGACGCCTCCGCGCCGTGCCGGCGCTGCGCGC | 72258 |
|       | *****                                                        |       |
| 52654 | TCCGCTTGCCCGGCCTGAAGGCCGCATCGAGGAACTTTCGCGCGCGAAAGTTCAGGCTGT | 52713 |
| 72259 | TCCGCTTGCCCGGCCTGAAGGCCGCATCGAGGAACTTTCGCGCGCGAAAGTTCAGGCTGT | 72318 |
|       | *****                                                        |       |
| 52714 | GGATCTGATCCGTGGTGTGCCGGCGCTGGTG                              | 52744 |
| 72319 | GGATCTGATCCGTGGTGTGCCGGCGCTGGTG                              | 72349 |
|       | *****                                                        |       |
