# Supplementary figures and images for: Genomic and Transcriptomic Changes That Mediate Increased Platinum Resistance in Cupriavidus metallidurans
Source: MDPI journal article supplement (doi:10.3390/genes10010063), 2019-01-18

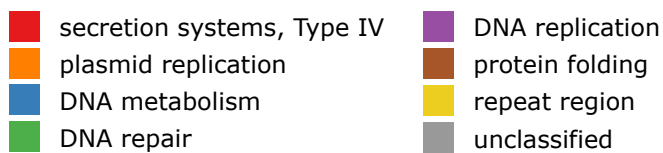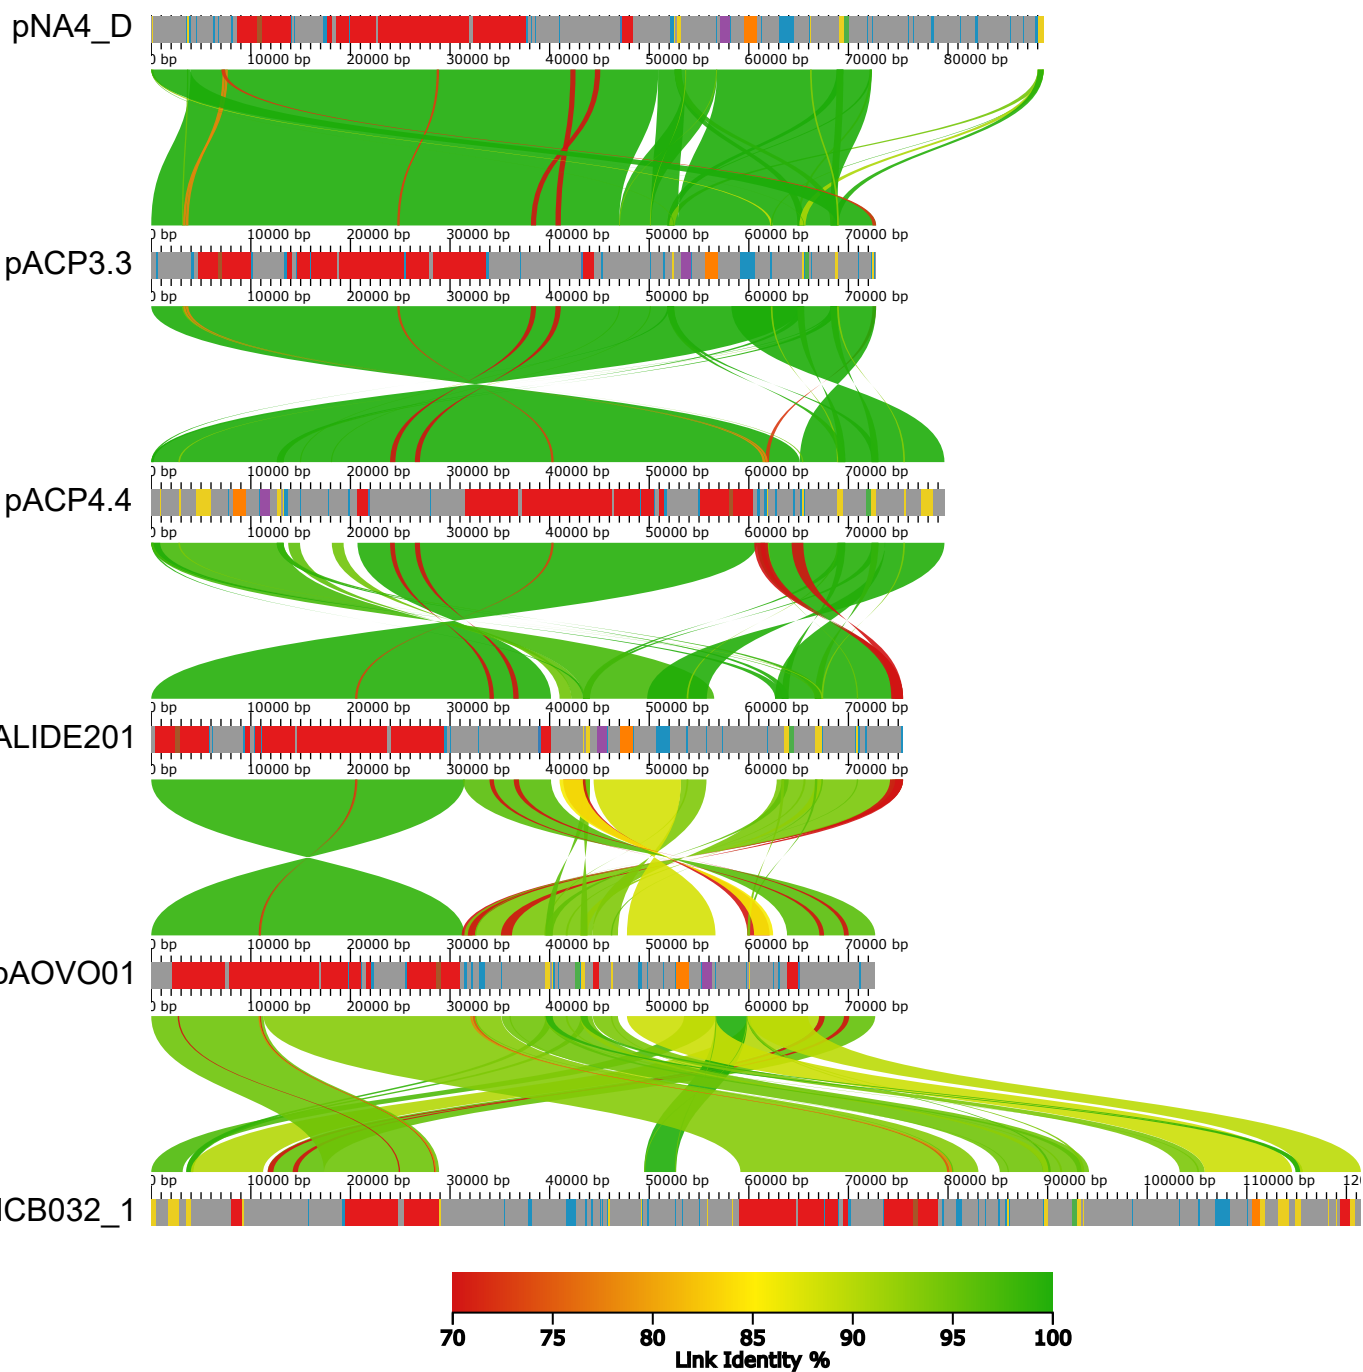

Supplement: s1 [file s1]

■ *sil* cluster (ABCD)
 ■ *cop* cluster (WEHQLOFGJIDCBARSNKMTV)
 ■ *ncc/nre* cluster (*nccCBA nreB*)

1

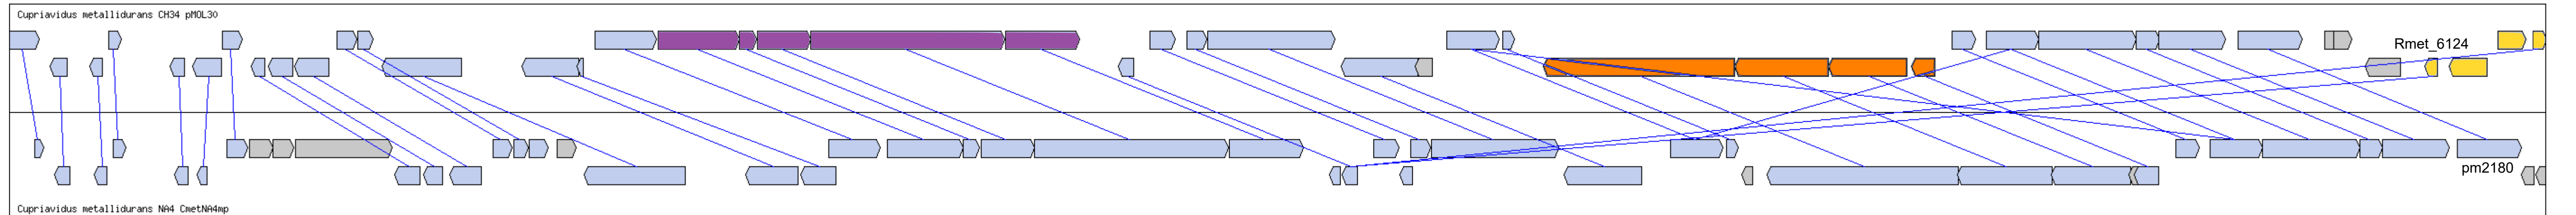

2

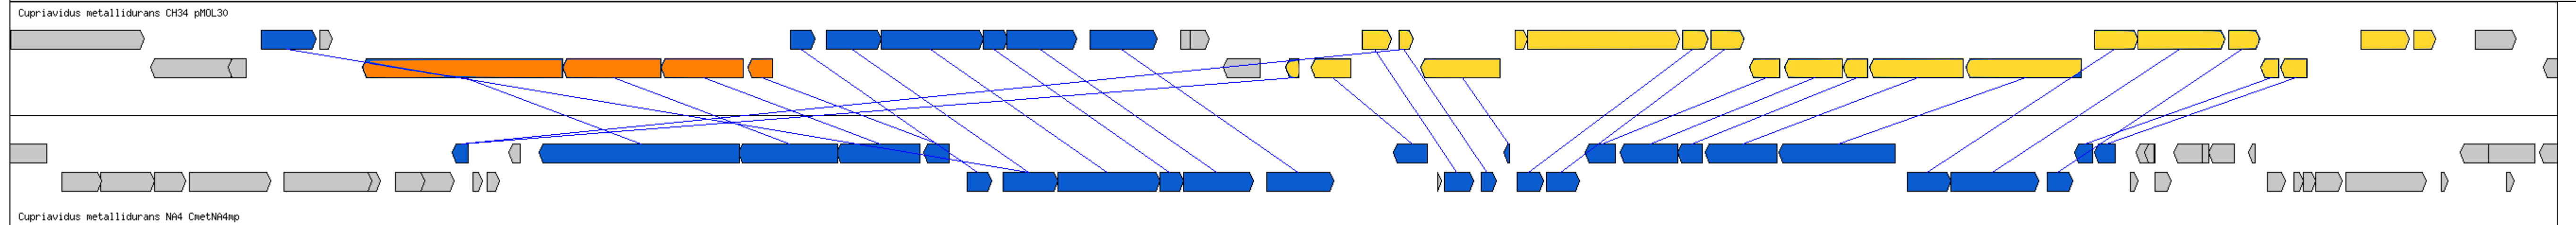

3

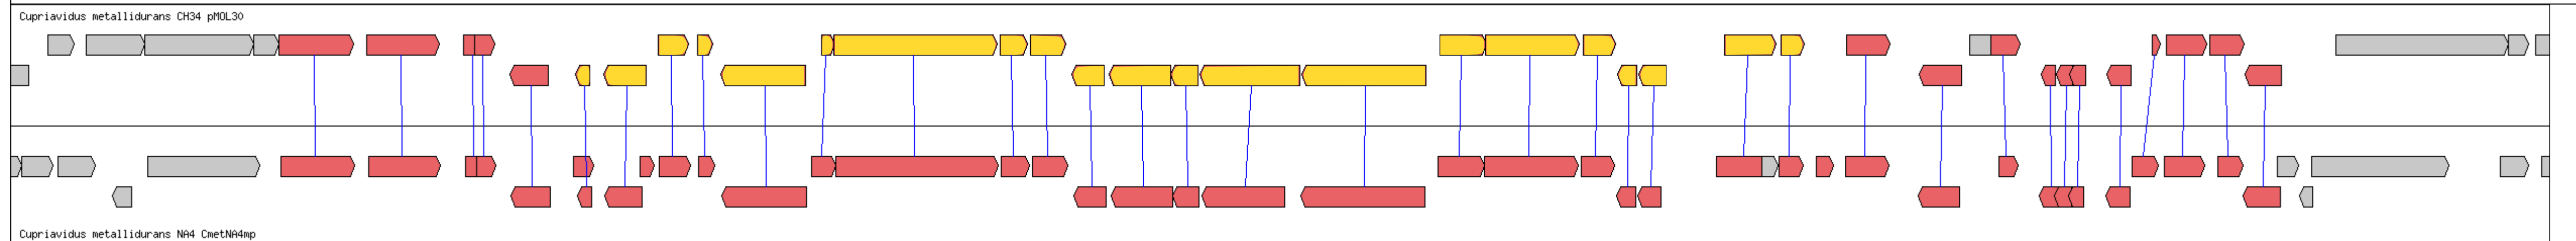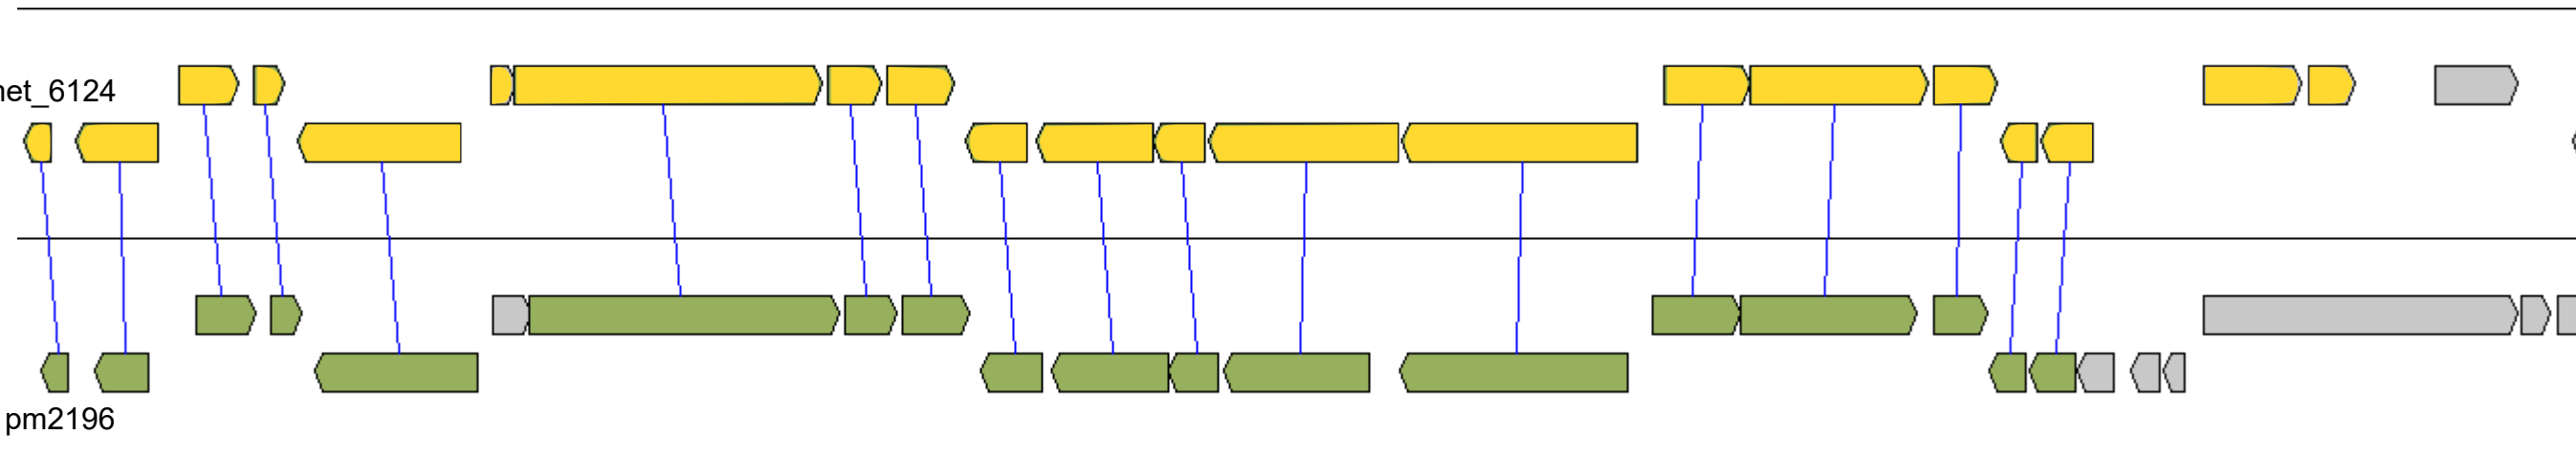

Supplement: s1 [file s1]
